# Supplementary material for: Cysteine Rich Intestinal Protein 2 is a copper-responsive regulator of skeletal muscle differentiation and metal homeostasis
Source: PubMed Central journal article supplement (PMC11671023; doi:10.1371/journal.pgen.1011495), 2024-12-05
Supplement: pgen.1011495.s014.pdf [file pgen.1011495.s014.pdf]

## S2\_Table

## List of primers used in this study.

| Primer Name            | 5' Sequence                     | 3' sequence                    | Use                            |
|------------------------|---------------------------------|--------------------------------|--------------------------------|
| <i>Crip2</i>           | GAATTCGCCTCCAAGTGTCCC           | CCATGGTTGGGCTGAACTGTGC<br>CTTC | cloning into pR-RIBA and pBABE |
| <i>Crip2</i><br>sgRNA1 | CACCGGGACACTTGGAGGCCATG<br>GT   | AAACACCATGGCCTCCAAGTGT<br>CCC  | sgRNAs for CRISPR/Cas9         |
| <i>Crip2</i><br>sgRNA2 | CACCGCTTCCTCTCTACAGCTGAG<br>A   | AAACTCTCAGCTGTAGAGAGGA<br>AGC  | sgRNAs for CRISPR/Cas9         |
| <i>Crip2</i><br>sgRNA3 | CACCGTAGGGCTGGCCATCGTGC<br>TG   | AAACCAGCACGATGGCCAGCCC<br>TAC  | gRNAs for CRISPR/Cas9          |
| <i>q-Eef1A</i>         | GGCTTCACTGCTCAGGT<br>GATTATC    | ACACATGGGCTTGCCAGGGAC          | Gene Expression                |
| <i>q-Pax7</i>          | GCAGCTGGAGGAGCTAGAGAAG          | GTCTCCTGGCTTGATGGAGTC          | Gene expression                |
| <i>q-Myog</i>          | CAAGTGTGCACATCTGTTCTAGTC<br>TCT | GTATCATCAGCACAGGAGACCT<br>TGGT | Gene expression                |
| <i>q-Mck</i>           | GCCGGGGATGAGGAGTCCTAC           | GCAGTGCGGAGGCAGAGTGTA          | Gene expression                |
| <i>q-Mtf1</i>          | AGATGATATTGTCGTCTGGACTGT<br>G   | GAAGCGGAAGTGACGCTAGGG<br>ACAG  | Gene expression                |
| <i>q-RpsA</i>          | GGTGGCACCAACCTTGACTTTC          | GTCAGCAGGATTCTCGATGGCA         | Gene expression                |
| <i>q-Rps8</i>          | GGAGGCAATAAGAAGTACCGTGC         | TTGGTGCGGACAAGCTCGTTGT         | Gene expression                |
| <i>ch-MyoD1</i>        | GCTCAGCAACTATGCTCTACA           | CGCCCTCCAAAGCGCACAAAT          | ChIP-qPCR                      |
| <i>ch-Mt1</i>          | CTCCGCCCCGAAAAGTGCGCTC          | GAAGCTGGAGCTACGGAGTAA          | ChIP-qPCR                      |
| <i>ch-Mt2</i>          | TTAGCACACAAGACATGC              | TTTCTCCCGAGTCCCTT              | ChIP-qPCR                      |
