# Supplementary material for: Cysteine Rich Intestinal Protein 2 is a copper-responsive regulator of skeletal muscle differentiation and metal homeostasis
Source: PubMed Central journal article supplement (PMC11671023; doi:10.1371/journal.pgen.1011495), 2024-12-05
Supplement: pgen.1011495.s015.pdf [file pgen.1011495.s015.pdf]

**Parameters obtained from Cyclic voltammetry at different scan rates for Au bare and cysteine modified electrodes with hsCRIP2 protein.**

| Protein                      | E°<br>(mV vs<br>Ag/AgCl) | $\Delta E_p$<br>(mV) | $k_s$<br>(s <sup>-1</sup> ) | $\alpha$ | $\Gamma$<br>(mol*cm <sup>-2</sup> ) |
|------------------------------|--------------------------|----------------------|-----------------------------|----------|-------------------------------------|
| <sup>a</sup> Au-Cys/CRIP2-Cu | 151                      | 295                  | 1.02                        | 0.53     | 1.07x10 <sup>-10</sup>              |
| <sup>a</sup> Au/CRIP2-Cu     | n.c                      | n.c                  | n.c                         | n.c      | n.c.                                |
| <sup>b</sup> Au/Cu-SOD       | n.c                      | n.c                  | n.c                         | n.c      | n.c.                                |
| <sup>b</sup> Au-Cys/Cu-SOD1  | 88                       | 213                  | 1.05                        | 0.54     | 4.28x10 <sup>-11</sup>              |

n.c. *not calculated*, due the absence of either the oxidation or reduction signal.

<sup>a</sup> hsCRIP2 cyclic voltammetry parameters.

<sup>b</sup> For comparison: Published values obtained for SOD1 by Jimenez-Gonzalez *et al.*, 2023

### Reference

M.L. Jimenez-Gonzalez JJG-G, R. Antano-Lopez , L. Ortiz-Frade. Thermodynamic study of superoxide dismutase adsorption processes over cysteine-gold electrode. *Electrochimica Acta*. 2023;440(141677). doi: 10.1016/j.electacta.2022.141677.
